# 1 **Assessing the feasibility and impact of clinical trial** 2 **trustworthiness checks via an application to Cochrane** 3 **Reviews: Stage 2 of the INSPECT-SR project**

4

5 Jack Wilkinson<sup>1\*</sup>, Calvin Heal<sup>1\*</sup>, Georgios A Antoniou<sup>2,3</sup>, Ella Flemmyng<sup>4</sup>, Love Ahnström<sup>5</sup>, Alessandra  
6 Alteri<sup>6</sup>, Alison Avenell<sup>7</sup>, Timothy Hugh Barker<sup>8</sup>, David N Borg<sup>9,10</sup>, Nicholas JL Brown<sup>11</sup>, Rob Buhmann<sup>12</sup>,  
7 Jose A Calvache<sup>13,14</sup>, Rickard Carlsson<sup>11</sup>, Lesley-Anne Carter<sup>1</sup>, Aidan G Cashin<sup>15,16</sup>, Sarah Cotterill<sup>1</sup>,  
8 Kenneth Färnqvist<sup>17</sup>, Michael C Ferraro<sup>15,16</sup>, Steph Grohmann<sup>4</sup>, Lyle C Gurrin<sup>18</sup>, Jill A Hayden<sup>19</sup>, Kylie E  
9 Hunter<sup>20</sup>, Natalie Hyltse<sup>11</sup>, Lukas Jung<sup>21</sup>, Ashma Krishan<sup>1</sup>, Silvy Laporte<sup>22</sup>, Toby J Lasserson<sup>4</sup>, David RT  
10 Laursen<sup>23,24</sup>, Sarah Lensen<sup>25</sup>, Wentao Li<sup>26</sup>, Tianjing Li<sup>27</sup>, Jianping Liu<sup>28</sup>, Clara Locher<sup>29</sup>, Zewen Lu<sup>1</sup>,  
11 Andreas Lundh<sup>23,24,30</sup>, Antonia Marsden<sup>1</sup> Gideon Meyerowitz-Katz<sup>31</sup>, Ben W Mol<sup>25</sup>, Zachary Munn<sup>26</sup>,  
12 Florian Naudet<sup>29</sup>, David Nunan<sup>32</sup>, Neil E O'Connell<sup>33</sup>, Natasha Olsson<sup>5</sup>, Lisa Parker<sup>34</sup>, Eleftheria  
13 Patetsini<sup>35</sup>, Barbara Redman<sup>36</sup>, Sarah Rhodes<sup>1</sup>, Rachel Richardson<sup>37</sup>, Martin Ringsten<sup>38</sup>, Ewelina  
14 Rogozińska<sup>39</sup>, Anna Lene Seidler<sup>20</sup>, Kyle Sheldrick<sup>40</sup>, Katie Stocking<sup>1</sup>, Emma Sydenham<sup>41</sup>, Hugh  
15 Thomas<sup>42</sup>, Sofia Tsokani<sup>37,43</sup> Constant Vinatier<sup>29</sup>, Colby J Vorland<sup>44</sup>, Rui Wang<sup>20</sup>, Bassel H Al Wattar<sup>45</sup>,  
16 Florencia Weber<sup>46</sup>, Stephanie Weibel<sup>46</sup>, Madelon van Wely<sup>47</sup>, Chang Xu<sup>48, 49</sup>, Lisa Bero<sup>50+</sup>, Jamie J  
17 Kirkham<sup>1†</sup>

18

19 \*Joint first authorship

20 †Joint senior authorship

21

22 1. Centre for Biostatistics, The University of Manchester, Manchester Academic Health Science  
23 Centre, Manchester, UK

24 2. Manchester Vascular Centre, Manchester University NHS Foundation Trust, Manchester, UK

25 3. Division of Cardiovascular Sciences, School of Medical Sciences, Manchester Academic Health  
26 Science Centre, The University of Manchester, Manchester, UK

27 4. Evidence Production and Methods Directorate, Cochrane Central Executive, London, UK

28 5. Department of Clinical Neuroscience, Karolinska Institutet, Stockholm, Sweden

29 6. Obstetrics and Gynaecology Unit, IRCCS San Raffaele Scientific Institute, Milan, Italy

30 7. Health Services Research Unit, University of Aberdeen, Aberdeen, UK

31 8. Health Evidence Synthesis, Recommendations and Impact, School of Public Health, The University  
32 of Adelaide, SA, Australia

33 9. Australian Sports Commission, Australian Institute of Sport, Bruce, Australian Capital Territory,  
34 Australia

35 10. Queensland University of Technology, School of Exercise Nutrition Sciences, Brisbane,  
36 Queensland, Australia.

**NOTE: This preprint reports new research that has not been certified by peer review and should not be used to guide clinical practice.**

- 37 11. Department of Psychology, Linnaeus University, Växjö, Sweden
- 38 12. University of the Sunshine Coast, School of Health, Queensland, Australia
- 39 13. Department of Anesthesiology, Erasmus MC, The Netherlands
- 40 14. Department of Anesthesiology, Universidad del Cauca, Colombia
- 41 15. Centre for Pain IMPACT, Neuroscience Research Australia, Randwick, Australia
- 42 16. School of Health Sciences, Faculty of Medicine and Health, University of New South Wales
- 43 Sydney, Australia
- 44 17. Department of Molecular medicine and surgery, Karolinska Institute, Stockholm, Sweden
- 45 18. School of Population and Global Health, The University of Melbourne
- 46 19. Department of Community Health & Epidemiology, Dalhousie University, Halifax, Canada
- 47 20. NHMRC Clinical Trials Centre, University of Sydney, Australia
- 48 21. Independent researcher, Heidelberg, Germany
- 49 22. Clinical Pharmacology Unit, INSERM U1059 Sainbiose, University Hospital of Saint-Etienne,
- 50 France
- 51 23. Cochrane Denmark & Centre for Evidence-Based Medicine Odense (CEBMO), Department of
- 52 Clinical Research, University of Southern Denmark, Odense, Denmark
- 53 24. Open Patient data Explorative Network (OPEN), Odense University Hospital, Odense, Denmark
- 54 25. Department of Obstetrics, Gynaecology and Newborn Health, Royal Women's Hospital,
- 55 University of Melbourne, Melbourne, VIC, Australia
- 56 26. National Perinatal Epidemiology and Statistics Unit, Centre for Big Data Research in Health and
- 57 School of Women's and Children's Health, The University of New South Wales, Sydney, Australia
- 58 27. Department of Ophthalmology and Department of Epidemiology, University of Colorado
- 59 Anschutz Medical Campus, Colorado, USA
- 60 28. Centre for Evidence-Based Chinese Medicine, Beijing University of Chinese Medicine, Beijing,
- 61 China.
- 62 29. Univ Rennes, CHU Rennes, Inserm, EHESP, Irset (Institut de recherche en santé, environnement
- 63 et travail) - UMR\_S 1085, Centre d'investigation clinique de Rennes (CIC1414), F-35000 Rennes,
- 64 France
- 65 30. Department of Respiratory Medicine and Infectious Diseases, Copenhagen University Hospital,
- 66 Bispebjerg and Frederiksberg, Denmark
- 67 31. School of Nursing, University of Wollongong, Australia
- 68 32. Centre for Evidence-Based Medicine, Nuffield Department of Primary Care Health Sciences,
- 69 University of Oxford, Oxford, UK
- 70 33. Dept of Health Sciences, Centre for Health and Wellbeing across the Lifecourse, Brunel University
- 71 London, UK

- 72 34. Faculty of Medicine & Health, Charles Perkins Centre, University of Sydney, NSW, Australia
- 73 35. York Trials Unit, Department of Health Sciences, University of York, York, UK
- 74 36. New York University Grossman School of Medicine, New York, USA
- 75 37. Methods Support Unit, Cochrane, UK
- 76 38. Cochrane Sweden, Skåne University Hospital, Lund University, Lund, Sweden
- 77 39. Meta-Analysis Group, Institute of Clinical Trials and Methodology, MRC Clinical Trials Unit at UCL,  
78 London, UK
- 79 40. Faculty of Medicine, University of New South Wales, Australia
- 80 41. Cochrane Central Editorial Service, London, UK
- 81 42. The Lancet Gastroenterology & Hepatology, London, UK
- 82 43. Laboratory of Hygiene, Social & Preventive Medicine and Medical Statistics, School of Medicine,  
83 Aristotle University of Thessaloniki, Thessaloniki, Greece
- 84 44. Department of Epidemiology and Biostatistics, Indiana University School of Public Health-  
85 Bloomington, USA
- 86 45. Clinical Trials Unit, Anglia Ruskin University, Chelmsford, UK
- 87 46. University Hospital Würzburg, Department of Anaesthesiology, Intensive Care, Emergency and  
88 Pain Medicine, Würzburg, Germany
- 89 47. Centre for Reproductive Medicine, Department of Obstetrics and Gynaecology, Amsterdam  
90 University Medical Center, Netherlands
- 91 48. The Third Department of Hepatic Surgery, Eastern Hepatobiliary Surgery Hospital, Third Affiliated  
92 Hospital, Second Military Medical University, Naval Medical University, Shanghai, China
- 93 49. Proof of Concept Center, Eastern Hepatobiliary Surgery Hospital, Third Affiliated Hospital, Second  
94 Military Medical University, Naval Medical University, Shanghai, China
- 95 50. University of Colorado Anschutz Medical Campus, Colorado, USA

96

## 97 **What is new**

- 98 ● An extensive list of potential checks for assessing study trustworthiness was assessed via an  
99 application to 95 randomised controlled trials (RCTs) in 50 Cochrane Reviews.
- 100 ● Following application of the checks, assessors had concerns about the authenticity of 32% of  
101 the RCTs.
- 102 ● If these RCTs were excluded, 22% of meta-analyses would have no remaining RCTs.
- 103 ● However, the study showed that some checks were frequently infeasible, and others could  
104 be easily misunderstood or misinterpreted.
- 105 ● The study restricted assessment to meta-analyses including five or fewer RCTs, which might  
106 distort the impact of applying the checks.

107

108

## 109 **Abstract**

### 110 **Background**

111 The aim of the INSPECT-SR project is to develop a tool to identify problematic RCTs in  
112 systematic reviews. In Stage 1 of the project, a list of potential trustworthiness checks was  
113 created. The checks on this list must be evaluated to determine which should be included in  
114 the INSPECT-SR tool.

### 115 **Methods**

116 We attempted to apply 72 trustworthiness checks to RCTs in 50 Cochrane Reviews. For each,  
117 we recorded whether the check was passed, failed or possibly failed, or whether it was not  
118 feasible to complete the check. Following application of the checks, we recorded whether  
119 we had concerns about the authenticity of each RCT. We repeated each meta-analysis after  
120 removing RCTs flagged by each check, and again after removing RCTs where we had  
121 concerns about authenticity, to estimate the impact of trustworthiness assessment.  
122 Trustworthiness assessments were compared to Risk of Bias and GRADE assessments in the  
123 reviews.

124

### 125 **Results**

126 95 RCTs were assessed. Following application of the checks, assessors had some or serious  
127 concerns about the authenticity of 25% and 6% of the RCTs, respectively. Removing RCTs  
128 with either some or serious concerns resulted in 22% of meta-analyses having no remaining  
129 RCTs. However, many checks proved difficult to understand or implement, which may have  
130 led to unwarranted scepticism in some instances. Furthermore, we restricted assessment to  
131 meta-analyses with no more than 5 RCTs, which will distort the impact on results. No  
132 relationship was identified between trustworthiness assessment and Risk of Bias or GRADE.

133

### 134 **Conclusions**

135 This study supports the case for routine trustworthiness assessment in systematic reviews,  
136 as problematic studies do not appear to be flagged by Risk of Bias assessment. The study  
137 produced evidence on the feasibility and impact of trustworthiness checks. These results  
138 will be used, in conjunction with those from a subsequent Delphi process, to determine  
139 which checks should be included in the INSPECT-SR tool.

140

### 141 **Plain language summary**

142 Systematic reviews collate evidence from randomised controlled trials (RCTs) to find out  
143 whether health interventions are safe and effective. However, it is now recognised that the

144 findings of some RCTs are not genuine, and some of these studies appear to have been  
145 fabricated. Various checks for these “problematic” RCTs have been proposed, but it is  
146 necessary to evaluate these checks to find out which are useful and which are feasible. We  
147 applied a comprehensive list of “trustworthiness checks” to 95 RCTs in 50 systematic  
148 reviews to learn more about them, and to see how often performing the checks would lead  
149 us to classify RCTs as being potentially inauthentic. We found that applying the checks led to  
150 concerns about the authenticity of around 1 in 3 RCTs. However, we found that many of the  
151 checks were difficult to perform and could have been misinterpreted. This might have led us  
152 to be overly sceptical in some cases. The findings from this study will be used, alongside  
153 other evidence, to decide which of these checks should be performed routinely to try to  
154 identify problematic RCTs, to stop them from being mistaken for genuine studies and  
155 potentially being used to inform healthcare decisions.

156

## 157 **MAIN TEXT**

### 158 **Background**

159 Systematic reviews of randomised controlled trials (RCTs) aim to include all trials that  
160 address the review question and meet the prespecified eligibility criteria. There is an  
161 understanding that RCTs included in a systematic review should be scrutinised for their  
162 internal validity, for example, using Risk of Bias tools (1, 2). These assessments require that  
163 the reviewer can trust what is written in a trial report to be an authentic account of what  
164 took place. However, this no longer appears to be tenable as a default assumption, as  
165 recent large-scale assessments have cast doubt on the veracity of many RCTs submitted to  
166 journals (3) or published in systematic reviews (4). Recent examples, such as ivermectin for  
167 COVID-19, illustrate how the failure to routinely interrogate the authenticity of eligible RCTs  
168 in systematic reviews allows fake studies to influence patient care (5).

169 Cochrane defines ‘*problematic studies*’ as studies where there are ‘serious questions about  
170 the trustworthiness of the data or findings’ (6). Problematic studies could represent  
171 instances of academic misconduct such as research fraud, or could be the result of critical  
172 errors in trial processes. Cochrane policy, introduced in 2021, states that potentially  
173 problematic RCTs should not be included in a systematic review (6, 7). This prompts the  
174 question of what criteria could be used to identify problematic studies, which may appear to  
175 be high-quality on the basis of traditional Risk of Bias assessment (8). Cochrane’s  
176 implementation guidance recognises that a number of methods for identifying problematic  
177 studies have been proposed, but does not recommend a method at this time.

178 The aim of the INSPECT-SR (INveStigating PROblEmatic Clinical Trials in Systematic Reviews)  
179 project is to develop a tool that can be used by systematic reviewers to assess the  
180 trustworthiness of RCTs (9). Several tools have recently been proposed for this purpose (10-  
181 14). However, none of these have involved a comprehensive evaluation and subsequent  
182 selection of potential trustworthiness checks. In Stage 1 of the development process, we

183 identified an extensive list of potential trustworthiness checks (15). A tool including all of  
184 these checks would not be practicable, and we anticipate that many of the checks will turn  
185 out to be infeasible or otherwise not useful. In Stages 2 (application to Cochrane Reviews)  
186 and 3 (Delphi survey), the checks on this list will be evaluated to determine which should be  
187 included in the final tool. These results will then feed into a series of consensus meetings  
188 (Stage 4) which will be used to develop a draft version of the INSPECT-SR tool. The draft tool  
189 will then be tested in the assessment of RCTs (Stage 5). Feedback from Stage 5 will be used  
190 to finalise the tool. The current study describes Stage 2 of the project, in which the  
191 identified checks were applied to RCTs included in a sample of Cochrane Reviews, in order  
192 to evaluate their feasibility and impact on review results, and to evaluate how often  
193 assessors had concerns about the authenticity of RCTs after applying the checks.

194

## 195 **Methods**

196 A protocol describing the INSPECT-SR project methods has previously been published (9).  
197 We undertook a large, collaborative project in which assessors applied a series of 72  
198 trustworthiness checks to RCTs included in 50 Cochrane Reviews. The University of  
199 Manchester Ethics tool was used to determine that ethical approval was not required for  
200 this study (30th Sept 2022).

201

### 202 *Description of trustworthiness checks*

203 Prior to this exercise, a list of trustworthiness checks was assembled using a scoping review  
204 (16), qualitative study (17) and survey of experts (15). This list contained 116 checks  
205 arranged into five domains: *Inspecting results in the paper*, *Inspecting the research team and*  
206 *their work*, *Inspecting conduct, governance and transparency*, *Inspecting text and*  
207 *publication details*, and *Inspecting individual participant data*. In the current study we only  
208 considered the first four domains, as individual participant data are not generally available  
209 during systematic reviews and meta-analyses based on aggregate data; nor were they  
210 available to us. An extension to the INSPECT-SR tool based on the checks in the fifth domain,  
211 which can be applied when individual participant data are available, 'INSPECT-IPD', has been  
212 funded for development (Reference: NIHR30355). The first four domains included 76 checks  
213 (Tables 1 and 2). We made some modifications to the list in preparation for the current  
214 study, in consultation with the project expert advisory panel. This included refining the  
215 language of some items to improve clarity. To assist assessors in applying the checks, we  
216 drafted brief explanations for each check (S Tables 1 to 4). Four checks (checks 45, 66, 67,  
217 72, Tables 1 and 2) were not assessed as they were not considered practicable in the  
218 context of the present study. Consequently, 72 checks were assessed.

219

### 220 *Description of assessors*

221 The INSPECT-SR working group includes a core management group and an expert advisory  
222 panel. Members of both were invited to act as assessors for the current study. We also  
223 invited additional collaborators who had expressed an interest in contributing to the  
224 development process. Collaborators were identified from a variety of sources. We invited  
225 attendees at presentations relating to the project to contact us to express an interest, and  
226 also invited individuals who had expressed an interest in the topic to JW using personalised  
227 emails and via social media. All assessors were considered to have sufficient expertise in  
228 research methods (specifically, to evaluate RCTs) to enable them to undertake the  
229 assessment. We did not require assessors to hold any particular qualification however. We  
230 did not require assessors to have specialist expertise relating to research integrity (for  
231 example, use of forensic statistical methods or investigation of misconduct cases), as a key  
232 objective was to learn about the usefulness and feasibility of the checks when applied by  
233 potential users of the INSPECT-SR tool (i.e. systematic reviewers, researchers, peer  
234 reviewers) who would not be expected to possess this specialist knowledge. Assessors who  
235 were considered to have made a substantial contribution to data acquisition and critical  
236 review of manuscript drafts, were given the option to co-author the manuscript.

237

### 238 *Selection of Cochrane Reviews and RCTs*

239 The sample size of 50 Cochrane reviews represented a number that was considered feasible  
240 to complete, while facilitating the evaluation of feasibility and impact of applying the checks  
241 across different topic areas. A preliminary pilot was conducted on a small number of RCTs to  
242 confirm this. The 50 reviews were purposefully selected from the Cochrane Library. To be  
243 eligible, a review could not be authored or co-authored by the assessor, and could not  
244 contain RCTs authored or co-authored by the assessor, to prevent any conflict of interest in  
245 conducting the assessment. As a feasibility requirement, we also required that the review  
246 contained at least one (meta-) analysis containing one to five RCTs. For brevity, we use the  
247 term 'meta-analysis' in this article to describe an analysis which produces a pooled average  
248 estimate and confidence interval for a treatment effect on an outcome based on the  
249 included studies, recognising that, when there is only one study, this involves reporting the  
250 estimate and confidence interval from that study. The RCTs in the first eligible meta-analysis  
251 in the review were subjected to the trustworthiness assessment, as a feasibility constraint.  
252 We also required that the review had not already undergone a trustworthiness assessment  
253 as part of the review process, since this could have resulted in the prior removal of  
254 problematic studies, distorting our assessment. Assessors were asked to suggest a topic  
255 with which they were broadly familiar. We attempted to match assessors to review topics,  
256 to replicate a typical scenario in which INSPECT-SR would be used (a systematic review  
257 would often be undertaken by someone with some relevant subject-matter knowledge). We  
258 then selected the most recent Cochrane Review relating to the topic suggested by the  
259 assessor that met the eligibility criteria. Assessors did not always have subject-matter  
260 knowledge relating to the review(s) they assessed, however. For example, some assessors  
261 were primarily methodologists, with limited clinical knowledge of the subject matter. For

262 these people, we attempted to select review topics to cover a broad range of health areas.  
263 We asked each assessor to record their familiarity with the review topic during data  
264 extraction (little or no familiarity, some familiarity, or high familiarity).

265

#### 266 *Data extraction and trustworthiness assessment*

267 A bespoke data extraction form was produced, and was revised following piloting on a small  
268 number of RCTs, and can be accessed at <https://osf.io/9pyw2/> . Assessors were informed of  
269 software that could be used to implement some of the statistical checks. Examples include  
270 the scrutiny package in R (18), online applications created to implement some checks e.g.  
271 (19, 20), or Microsoft Excel (21) for basic statistical checks, but it was not a requirement to  
272 use any particular software to undertake the assessment. For each Cochrane Review, the  
273 assessor extracted data and applied the list of checks to each RCT in the meta-analysis. An  
274 exception was check 26 - *Is there heterogeneity across studies in degree of imbalance in*  
275 *baseline characteristics (in meta-analysis)*, which was assessed only once per review. The  
276 assessor extracted the year of publication for each RCT, the summary data entered in the  
277 meta-analysis, and Risk of Bias and GRADE (Grading of Recommendations Assessment,  
278 Development and Evaluation) (22) assessments as presented in the Cochrane Review.

279 A second assessor checked the accuracy and completeness of this information following  
280 extraction. Any disagreements were resolved by discussion between assessors and a third  
281 team member (JW). The assessor attempted to apply each of the 72 checks to the trial,  
282 selecting one of four response options: not feasible; passed the check; possible fail; fail. For  
283 each check, assessors were asked to supply free text to explain their assessment. The  
284 country or countries in which the RCT was conducted was also recorded. After applying the  
285 checks, assessors recorded their answer to the question “Do you have concerns about the  
286 authenticity of this study?” using one of four response options: no; some concerns; serious  
287 concerns; don’t know. Assessors were asked if they had performed any additional checks  
288 (not included on the list) and if so, to describe both the checks and the results of applying  
289 them. There was space for the assessor to add any additional information, and to provide  
290 an estimate of how many hours it took them to assess the RCT. The intention had been for  
291 one assessor to assess all of the RCTs in the review, before checking by a second assessor.  
292 However, some assessors failed to complete the assessment of all RCTs in their allocated  
293 review, and so for several reviews the RCTs were split between two assessors, before being  
294 checked by a third assessor.

295

#### 296 *Statistical analysis*

297 We summarised trial and Cochrane Review characteristics, and the responses for each  
298 check. We calculated how often assessors had concerns about study authenticity. We  
299 evaluated the impact of applying each check by comparing the analysis/ meta-analysis



300 including all trials as per the review to a version in which any RCTs flagged by the check  
301 were removed, in terms of the numbers of trials, sample size, change in effect estimate, 95%  
302 confidence interval width, heterogeneity, and change in inference.

303 The first two of these metrics were assessed over all reviews, while the remainder were  
304 assessed separately for binary and continuous outcomes. We used the metafor package (23)  
305 in R to perform all meta-analyses, using odds ratios to summarise treatment effects with  
306 binary outcomes, and standardised mean differences to summarise treatment effects with  
307 continuous outcomes. Random effects meta-analyses using the DerSimonian and Laird (24)  
308 method were performed, as the most typical method employed in systematic reviews (25,  
309 26).

310 We assessed potential redundancies among the checks by plotting the responses for each  
311 check for each RCT in an array. We made the post-hoc decision to undertake a hierarchical  
312 cluster analysis, using complete agglomeration based on Gower dissimilarity, as  
313 implemented in the cluster package in R (27). We used multinomial regression to assess the  
314 relationship between trustworthiness assessment and each Risk of Bias domain, and ordinal  
315 regression (proportional odds logistic regression) to consider the relationship between the  
316 GRADE assessment and the number of trials flagged for concerns. We used likelihood ratio  
317 tests for inference following regression model fits. We conducted an additional analysis  
318 which had not been specified in the protocol, where we evaluated the relationship between  
319 the assessment for each check and the overall assessment of the trial using the N-1 chi-  
320 squared test (28), to determine which checks were influential in reaching an overall  
321 assessment. The N-1 chi-squared test was used in anticipation of small expected counts (29).  
322 This analysis was performed in trials where the check was considered to be feasible, and the  
323 assessments were analysed as 'passed' vs 'fail or possible fail'. We used a post-hoc  
324 significance threshold of 1% to highlight checks associated with the overall assessment,  
325 creating contingency tables (outcome of check vs overall assessment) for these checks to  
326 determine whether failing the check was associated with an assessor having overall  
327 concerns. We categorised the free-text responses to the question asking how long it took to  
328 complete the assessment in a post-hoc fashion (less than 90 minutes, 90 minutes to 3 hours,  
329 more than 3 hours). The dataset and analysis code for this study are available at  
330 <https://osf.io/9pyw2/> .

331

## 332 **Results**

333 We included a total of 95 RCTs from 50 Cochrane Reviews. The reviews were from 24  
334 different Cochrane Groups (S Table 5). Assessors considered themselves to have high  
335 familiarity with the review topic for 7/50 (14%) reviews, some familiarity for 20/50 (40%) of  
336 reviews, and little or no familiarity for 23/50 (46%). The characteristics of included Cochrane  
337 Reviews are shown in Table 3. The median (IQR) number of participants in the assessed RCTs  
338 was 71 (40 to 174). 15/95 (16%) were conducted in multiple countries, with the remaining  
339 80 taking place in one of 21 different countries (S Table 6). Twenty-four (26%) RCTs took less

340 than 90 minutes to assess, 29 (31%) took between 90 minutes and 3 hours, and 40 (42%)  
341 took more than 3 hours.

342

### 343 *Responses to individual trustworthiness checks*

344 Figure 1 and S Table 7 summarise the responses for each check, and S Figure 1 shows the  
345 study-level responses for each check. S Figure 2 shows how the checks are clustered in the  
346 dataset. Missing data for trustworthiness checks were infrequent, with only one check  
347 having missing data for as many as five RCTs (check 42). Check 26 is ‘missing’ for 10 RCTs, as  
348 it was only assessed once per review. A number of checks were considered to have ‘failed’  
349 or ‘possibly failed’ often. The five checks most often receiving an assessment of ‘failed’ or  
350 ‘possibly failed’ were check 61 - *Are the data publically available?* (81%), check 30 - *Are*  
351 *contributorship statements present?* (69%), check 31 - *Are contributorship statements*  
352 *complete?* (57%), check 64 - *Has the study been prospectively registered?* (56%), check 49 –  
353 *Is a funding source reported?* (40%). Some statistical checks frequently resulted in responses  
354 of ‘failed’ or ‘possibly failed’. Examples include check 12 - *Are differences in variances in*  
355 *baseline variables between randomised groups plausible?* (28%), check 11 – *Are statistical*  
356 *test [results] of outcomes correct?* (21%).

357 A number of checks were considered to be infeasible in most cases. The checks most  
358 frequently considered infeasible were check 40 - *Is the standard deviation of summary*  
359 *statistics in multiple studies by same authors plausible (when compared to simulated or*  
360 *bootstrapped data?)* (99%), check 62 - *Are additional patient data recorded in patient case*  
361 *records beyond what is reported in the paper?* (98%), check 38 - *Is the distribution of non-*  
362 *first digits in manuscripts from one author compatible with a genuine measurement*  
363 *process?* (90%), check 35 - *Is any duplicate reporting acknowledged or explained?* (89%), and  
364 check 29 - *Are withdrawal and loss to follow-up in multiple trials by the same author*  
365 *consistent with the expected (random) binomial distribution?* (84%).

366

### 367 *Overall assessment and relationship to individual checks*

368 Overall, responses to the question “Do you have concerns about the authenticity of this  
369 study?” were: no (60/95, 64%); some concerns (24/95, 25%); serious concerns (6/95, 6%).  
370 P-values from chi-squared tests looking at the outcome of each check against the overall  
371 trustworthiness assessment of the study are shown in S Table 8. Noting that these analyses  
372 were post-hoc and exploratory, 19 checks were associated with overall assessment using a  
373 1% significance level. Contingency tables were inspected to examine the nature of these  
374 associations (specifically to confirm that failing or possibly failing, rather than passing, a  
375 check was associated with the presence of concerns).

376 Of these 19, there were 11 checks for which failing (as opposed to passing) the check  
377 appeared to correlate with an assessment of overall concern: 1. *Are any baseline data*

378 *implausible with respect to magnitude, frequency, or variance? (p=0.00001); 2. Is the*  
379 *number of participant withdrawals compatible with the disease, age and timeline?*  
380 *(p=0.005); 8. Are there any discrepancies between data reported in figures, tables and text?*  
381 *(p = 0.00006), 9. Are any outcome data, including estimated treatment effects, implausible?*  
382 *(p = 0.000002), 19. Are results internally consistent? (p=0.00008), 37. Does the statistics*  
383 *methods section use generic language, suggesting lack of expert statistical input? (p=0.003),*  
384 *51. Is the reported staffing adequate for the study conduct as reported? (p=0.009), 52. Is the*  
385 *recruitment of participants plausible within the stated time frame for the research?*  
386 *(p=0.0005), 53. Is the recruitment of participants plausible considering the epidemiology of*  
387 *the disease in the area of the study location? (p=0.0004), 56. Are there any concerns about*  
388 *unethical practice? (p=0.001), 64. Has the study been prospectively registered? (p=0.004).*

389

### 390 *Impact of applying the trustworthiness assessments on systematic review results*

391 S Table 9 and S Table 10 show the impact of removing RCTs flagged by each check  
392 (considered individually) from meta-analysis, for binary and continuous outcomes  
393 respectively. In continuous outcome meta-analyses, removal of RCTs flagged by a check  
394 resulted in a median of 4% (IQR 0% to 12.5%, range 0% to 67%) of meta-analyses having no  
395 remaining trials. In binary outcome meta-analysis, the corresponding values were 4% (IQR  
396 0% to 8%, range 0% to 73%). The sample size of reviews would be reduced to a median (of  
397 means) of 93% (IQR 87% to 97%, range 27% to 100%) of the original size. The median (of  
398 means) number of trials that would be removed from meta-analysis was 0.14 (IQR 0.06 to  
399 0.24, range 0 to 1.52).

400 When RCTs were removed on the basis of the overall assessment (some or serious  
401 concerns), 33% of continuous outcome meta-analyses and 12% of binary outcome meta-  
402 analyses had no remaining trials. Amongst meta-analyses with at least one RCT remaining,  
403 for binary outcome meta-analyses, the mean ROR was 0.98; SE increased by 19% on  
404 average; none changed in terms of statistical significance (using a 5% significance threshold);  
405 and the mean ratio of confidence interval widths (width expressed as the ratio of upper to  
406 lower limit on OR scale) was 4.52. For continuous outcome meta-analyses with at least one  
407 RCT remaining, the average change in estimate was -0.02 SDs; SE (and, equivalently, CI  
408 width) increased by a mean of 5%; and none of the meta-analyses changed in terms of  
409 statistical significance.

410

### 411 *Relationship between trustworthiness assessments, Risk of Bias and GRADE*

412 We only investigated the relationship between overall trustworthiness assessment and risk  
413 of bias for reviews using the first version of the Cochrane RoB tool since there were only 10  
414 reviews applying RoB 2. Multinomial regression did not indicate associations between any  
415 risk of bias domain and overall concern, with the exception of allocation concealment.  
416 However, this was not in the expected direction, with concerns expressed more often for  
417 studies with unclear or low bias assessment compared to high bias assessment (p=0.01). The

418 estimated relationship between number of trials flagged for concerns and GRADE  
419 assessment was imprecise (OR = 0.68, 95% CI = (0.39 to 1.17)).

420

#### 421 *New checks used by assessors*

422 Assessors described eight checks which they used and which they felt were additional to the  
423 list of checks assessed in the study. Two of these – checking for trial registration, and  
424 checking the author list – were already covered by the primary list. Three others were  
425 variations of existing checks – checking the certification status of the ethical committee or  
426 institutional review board, looking at a related publication of a subgroup, and checking for  
427 consistency with the main article. Three were new: looking to see whether the authors  
428 exclusively worked together, checking whether the first author’s department had  
429 participated in other RCTs, and looking into the reported funder.

430

#### 431 **Discussion**

432 An extensive list of trustworthiness checks was assessed for their feasibility and impact by  
433 application to 95 RCTs in a sample of 50 Cochrane Reviews. The study allowed us to  
434 estimate how often each of the checks would be considered infeasible for routine use in  
435 systematic reviews, how often each would fail, and what the impact of applying the check  
436 would be on the estimates from meta-analysis. We found that, in the context of conducting  
437 a systematic review, the checks can be applied to identify problematic studies.  
438 Furthermore, the findings suggest that a substantial portion of meta-analyses would be left  
439 with no remaining RCTs if failed checks were used to identify and exclude problematic  
440 studies. Amongst those with remaining RCTs, there was a larger impact on precision than on  
441 the magnitude of effect estimates. The study also found that, following application of the  
442 checks, assessors frequently had concerns about the RCTs included in Cochrane Reviews,  
443 with “some concerns” being reported for 25% of studies, and “serious concerns” for a  
444 further 6%.

#### 445 *Feasibility of the checks*

446 A number of checks were deemed generally infeasible. For example, assessments which  
447 involved taking an author-wide view have been successfully implemented in particular cases  
448 (e.g. (8, 30, 31)), but were not considered feasible by assessors in the context of the current  
449 study. One possible reason is that these checks require additional data collection to find out  
450 more about the authors of a study, their research team, or their other publications. In a  
451 previous survey of experts, the need for a trustworthiness tool to be practical and not too  
452 burdensome was emphasised (15), and therefore checks which require the identification  
453 and comparison of additional studies are unlikely to be palatable. Other checks that were  
454 deemed infeasible include checking for evidence of copied work, including copied sample  
455 characteristics and results tables. Unless the copying is identified between RCTs that both  
456 happen to be included in the review, it is difficult to see how this sort of check would be  
457 practicable in the absence of automated solutions. Clearly, the results indicate that it would

458 not be feasible to apply such a long list of checks routinely, as this took more than 3 hours  
459 for 42% of the trials.

460

#### 461 *Identification of problematic studies*

462 Failed checks are potential indicators of a problematic trial. Some checks failed for most  
463 RCTs. For example, the study agreed with previous work suggesting that many (in the  
464 present study, most) RCTs are not prospectively registered (32-34), and few make the  
465 underlying data available (35). In relation to registration, assessors were much more likely to  
466 have concerns about authenticity for studies that were not prospectively registered  
467 compared to those that were. This could indicate that lack of registration was influential in  
468 reaching an overall judgement, or rather that studies with other problematic features were  
469 less likely to be prospectively registered. Prospective registration is routinely considered in  
470 relation to reporting bias, and an important question to be resolved in the INSPECT-SR  
471 development process is whether there is additional value in considering prospective  
472 registration in the assessment of trustworthiness.

473 Our findings also indicate that some checks may be prone to misinterpretation or  
474 misapplication, which was suggested by high failure rates. In particular, several statistical  
475 checks proved challenging. For example, 20% of RCTs were considered to have ‘failed’ or  
476 ‘possibly failed’ a check looking to see whether results of statistical tests of outcomes were  
477 correct. Some of these failures might be attributable to the rounding of continuous variables  
478 in published articles; p-values obtained from rounded summary statistics can differ from  
479 those obtained from analysis of the underlying data, meaning the question of assessing  
480 consistency cannot just be assessed reproducing the test and looking for an exact match  
481 (36). Another example was checking differences in baseline variance between groups, which  
482 “‘failed’” or “‘possibly failed’” for 28% of RCTs. Assessors were directed to use an F test  
483 here. However, this test has an inflated type 1 error rate for skewed variables (37), such that  
484 rejection of the test assumptions may have been frequently mistaken for rejection of the  
485 hypothesis of equality of variances. Instances such as these may have led to unwarranted  
486 skepticism about a study’s authenticity in some instances. Although we did not detect  
487 associations between failure of these checks and concerns in post-hoc analyses, it remains  
488 possible that errors of this nature did sometimes occur, and may have influenced the overall  
489 assessment of a trial’s authenticity.

490

#### 491 *Impact of identifying problematic studies on systematic reviews*

492 The impact of removing RCTs flagged by these checks from meta-analyses may appear  
493 alarming; for example, removing RCTs for which assessors expressed concerns would result  
494 in 11 of 50 meta-analyses with no RCTs remaining. However, caution is needed here due to  
495 limitations introduced by our study design. We only assessed meta-analyses containing five  
496 or fewer trials in this study. Consequently, more than half contained only a single RCT,  
497 which is fewer than is typical (38). This will exaggerate the number of reviews with no

498 remaining studies following trustworthiness assessment. Moreover, several other metrics,  
499 such as the change in point estimate and associated uncertainty, could only be evaluated in  
500 meta-analyses with at least one trial remaining following assessment. Due to the fact that  
501 many meta-analyses only included one trial initially, this subset will omit many of the meta-  
502 analyses with any trials flagged at all, causing the impact of the checks on these metrics to  
503 be understated.

504 In line with our expectations, there did not appear to be a clear association between Risk of  
505 Bias domains and overall trustworthiness assessment, reinforcing the premise that these  
506 frameworks are evaluating different aspects of trials. Many problematic studies appear to  
507 frequently describe perfectly sound methods (8). We were unable to ascertain whether  
508 there is any link between GRADE and trustworthiness assessment, as our estimate of the  
509 relationship was too imprecise. We suggest that trustworthiness assessment should be  
510 performed prior to Risk of Bias and GRADE assessments, because the value of assessing the  
511 internal or external validity of a problematic study is doubtful.

512

513

514 *Implications for development of INSPECT-SR and future directions*

515

516 These observations have informed the development of the INSPECT-SR tool and  
517 accompanying guidance. The findings highlight the need for careful curation of the checks  
518 included in INSPECT-SR, and suggest that any statistical checks included in the tool would  
519 have to be accompanied by detailed guidance to enable their application, as well as to  
520 prevent misuse and misinterpretation. As technological solutions become available to  
521 facilitate some useful but difficult checks, they can become part of the tool implementation.  
522 As the role of automation, including artificial intelligence, is likely to expand in evidence  
523 synthesis, it will be important to examine how it might enable or hinder detection of  
524 problematic RCTs (39). For example, some checks, such as statistical checks, may be more  
525 amenable to automation than checks that require more content knowledge, such as the  
526 plausibility of participant recruitment or effect sizes.

527 Additional future directions informed by this study will be development of training for  
528 INSPECT-SR and tools that can be applied to individual patient data or observational study  
529 designs. Creating a searchable, open archive of trials that have been evaluated with  
530 INSPECT-SR will aid all systematic reviewers and users of trials. Lastly, although INSPECT-SR  
531 is being developed for use by systematic reviewers, adaptations of the tool could also be  
532 useful to journal editors or publishers who screen trials for research integrity problems.

533

534 *Conclusion*

535 The study appears to reinforce the need for routine trustworthiness assessment in RCTs,  
536 suggesting that problematic studies in systematic reviews may not be infrequent, and are

537 not detected by Risk of Bias assessment. Only two of the studies judged to be concerning  
538 had associated retraction or expression of concern notices at the point of assessment,  
539 highlighting the need to evaluate other features in order to identify these untrustworthy  
540 trials. The time taken to complete the full barrage of checks for each RCT was long, and  
541 would likely not be practicable in the context of a typical systematic review. The goal of  
542 subsequent stages of the INSPECT-SR project will be to identify a subset of these checks that  
543 are both feasible and useful, and to implement these in the form of a tool that can be  
544 implemented by systematic reviewers. The results from this study will be used to select  
545 checks for this purpose, alongside a Delphi study of experts and potential users of the tool.  
546 Both sets of results will be presented to experts at a series of consensus meetings, which  
547 will be used to determine the content of a draft version of INSPECT-SR. The draft version of  
548 the tool will then be tested in the assessment of RCTs, and feedback will be used to finalise  
549 the tool in early 2025.

550

551

## 552 **Declarations**

553 JW, CH, GAA, LB, JJK declare funding from NIHR (NIHR203568) in relation to the current  
554 project. JW additionally declares Stats or Methodological Editor roles for BJOG, Fertility and  
555 Sterility, Reproduction and Fertility, Journal of Hypertension, and for Cochrane Gynaecology  
556 and Fertility. CH declares a Statistical Editor role for Cochrane Colorectal. GAA additionally  
557 declares a Statistical Reviewer role for the European Journal of Vascular and Endovascular  
558 Surgery. LB additionally declares a role as Academic Meta-Research Editor for PLoS Biology,  
559 and that The University of Colorado receives remuneration for service as Senior Research  
560 Integrity Editor, Cochrane. JJK additionally declares a Statistical Editor role for The BMJ. EF is  
561 employed by the Cochrane Collaboration and on the Editorial Board of Cochrane Evidence  
562 Synthesis and Methods. SL is an editor for Cochrane Gynaecology and Fertility, Human  
563 Reproduction, and Fertility and Sterility. TJL is the Deputy Editor in Chief of The Cochrane  
564 Library and is an employee of The Cochrane Collaboration. DNB is an associate editor for  
565 Research Quarterly for Exercise and Sport and a section editor for Communications in  
566 Kinesiology. NEO is a member of the Cochrane Editorial Board and holds an ERA-NET Neuron  
567 Co-Fund grant for a separate project. RR declares acting as an author and editor on  
568 Cochrane reviews. KS is an editor for Cochrane Gynaecology and Fertility, and Fertility and  
569 Sterility. MvW declares to be co-ordinating editor for Cochrane Gynaecology and Fertility  
570 and Cochrane Sexually Transmitted Infections, methodological editor for Human  
571 Reproduction Update and Editorial Editor for Fertility & Sterility. HT is Deputy Editor of The  
572 Lancet Gastroenterology & Hepatology and is an employee of Elsevier. SL received funding  
573 from the French National Research Agency (ANR-23-CE36-0006-01). AK is an editorial board  
574 member for BJGP Open. TLi serves as the Principal Investigator on a grant from the National  
575 Eye Institute, National Institutes of Health that funds the work of Cochrane Eyes and Vision  
576 US Project. She also acts as a sign-off editor for The Cochrane Library. ZM is supported by an  
577 NHMRC Investigator Grant 1195676. ZM is an associate Editor for BMC Medical Research  
578 Methodology and is on the Editorial Board for Clinical and Public Health Guidelines. RC is

579 Editor-in-Chief at Meta-Psychology. CL is a work-package leader for the doctoral network  
580 MSCA-DN SHARE-CTD (HORIZON-MSCA-2022-DN-01 101120360), funded by the EU. CV  
581 received funding as part of the OSIRIS project (Open Science to Increase Reproducibility in  
582 Science); the OSIRIS (Open Science to Increase Reproducibility in Science) project has  
583 received funding from the EU (grant agreement No. 101094725). FN received funding from  
584 the French National Research Agency (ANR-23-CE36-0006-01), the French ministry of health  
585 and the French ministry of research. He is a work-package leader in the OSIRIS project (Open  
586 Science to Increase Reproducibility in Science). The OSIRIS project has received funding from  
587 the European Union's Horizon Europe research and innovation programme under grant  
588 agreement No. 101094725. He is a work-package leader for the doctoral network MSCA-DN  
589 SHARE-CTD (HORIZON-MSCA-2022-DN-01 101120360), funded by the EU. DN declares  
590 having led/co-authored/co-authoring Cochrane Reviews. He also declares having been part  
591 of the Cochrane Convenes initiative organised by Cochrane to consider the issue of  
592 misinformation, its impact on the health evidence ecosystem and solutions to address it. LJ  
593 is the creator of the scrutiny package in R. WL is supported by an NHMRC Investigator grant  
594 (GNT2016729). RW is supported by an NHMRC Investigator Grant (2009767) and acts as a  
595 Deputy Editor for Human Reproduction, and an editorial board member for BJOG and  
596 Cochrane Gynaecology and Fertility. EF, SGTLA and RR declare employment by Cochrane.  
597 TLa additionally declares authorship of a chapter in the Cochrane Handbook for Systematic  
598 Reviews of Interventions and that he is a developer of standards for Cochrane intervention  
599 reviews (MECIR). AL is on the editorial board of BMC Medical Ethics.

600

#### 601 **Ethical approval**

602 The University of Manchester ethics decision tool was used on 30/09/22. Ethical approval  
603 was not required for this study, since it involved appraisal of published research.

604

#### 605 **Funding**

606 This study/project is funded by the NIHR Research for Patient Benefit programme  
607 (NIHR203568). The views expressed are those of the author(s) and not necessarily those of  
608 the NIHR or the Department of Health and Social Care.

609

#### 610 **References**

- 611 1. Higgins JP, Altman DG, Gotzsche PC, Juni P, Moher D, Oxman AD, et al. The Cochrane  
612 Collaboration's tool for assessing risk of bias in randomised trials. *BMJ*. 2011;343:d5928.
- 613 2. Sterne JAC, Savovic J, Page MJ, Elbers RG, Blencowe NS, Boutron I, et al. RoB 2: a revised tool  
614 for assessing risk of bias in randomised trials. *BMJ*. 2019;366:l4898.
- 615 3. Carlisle JB. False individual patient data and zombie randomised controlled trials submitted  
616 to Anaesthesia. *Anaesthesia*. 2021;76(4):472-9.
- 617 4. Weeks J, Cuthbert A, Alfirevic Z. Trustworthiness assessment as an inclusion criterion for  
618 systematic reviews—What is the impact on results? *Cochrane Evidence Synthesis and Methods*.  
619 2023;1(10):e12037.
- 620 5. Hill A, Mirchandani M, Pilkington V. Ivermectin for COVID-19: Addressing Potential Bias and  
621 Medical Fraud. *Open Forum Infect Dis*. 2022;9(2):ofab645.



- 622 6. Cochrane. Cochrane Policy for managing potentially problematic studies. Cochrane Database  
623 of Systematic Reviews: editorial policies Cochrane Library [Available from:  
624 <https://www.cochranelibrary.com/cdsr/editorial-policies>.  
625 7. Boughton SL, Wilkinson J, Bero L. When beauty is but skin deep: dealing with problematic  
626 studies in systematic reviews. *Cochrane Database Syst Rev.* 2021;6(6):ED000152.  
627 8. O'Connell NE, Moore RA, Stewart G, Fisher E, Hearn L, Eccleston C, et al. Investigating the  
628 veracity of a sample of divergent published trial data in spinal pain. *Pain.* 2023;164(1):72-83.  
629 9. Wilkinson J, Heal C, Antoniou GA, Flemyng E, Alfirevic Z, Avenell A, et al. Protocol for the  
630 development of a tool (INSPECT-SR) to identify problematic randomised controlled trials in  
631 systematic reviews of health interventions. *BMJ Open.* 2024;14(3):e084164.  
632 10. Mol BW, Lai S, Rahim A, Bordewijk EM, Wang R, van Eekelen R, et al. Checklist to assess  
633 Trustworthiness in RANdomised Controlled Trials (TRACT checklist): concept proposal and pilot. *Res*  
634 *Integr Peer Rev.* 2023;8(1):6.  
635 11. Weibel S, Popp M, Reis S, Skoetz N, Garner P, Sydenham E. Identifying and managing  
636 problematic trials: A research integrity assessment tool for randomized controlled trials in evidence  
637 synthesis. *Res Synth Methods.* 2023;14(3):357-69.  
638 12. Hunter KE, Aberoumand M, Libesman S, Sotiropoulos JX, Williams JG, Aagerup J, et al. The  
639 Individual Participant Data Integrity Tool for assessing the integrity of randomised trials. *Res Synth*  
640 *Methods.* 2024.  
641 13. Abbott J, Acharya G, Aviram A, Barnhart K, Berghella V, Bradley CS, et al. Trustworthiness  
642 criteria for meta-analyses of randomized controlled studies: OBGYN journal guidelines. *Elsevier;*  
643 2024. p. 101481.  
644 14. Grey A, Bolland MJ, Avenell A, Klein AA, Gunsalus CK. Check for publication integrity before  
645 misconduct. *Nature.* 2020;577(7789):167-9.  
646 15. Wilkinson J, Heal C, Antoniou GA, Flemyng E, Avenell A, Barbour V, et al. A survey of experts  
647 to identify methods to detect problematic studies: stage 1 of the INveStigating ProblEmatic Clinical  
648 Trials in Systematic Reviews project. *J Clin Epidemiol.* 2024;175:111512.  
649 16. Bordewijk EM, Li W, van Eekelen R, Wang R, Showell M, Mol BW, et al. Methods to assess  
650 research misconduct in health-related research: A scoping review. *J Clin Epidemiol.* 2021;136:189-  
651 202.  
652 17. Parker L, Boughton S, Lawrence R, Bero L. Experts identified warning signs of fraudulent  
653 research: a qualitative study to inform a screening tool. *J Clin Epidemiol.* 2022;151:1-17.  
654 18. Jung L. scrutiny: Error Detection in Science. R package version 0.3.0. 2023 [Available from:  
655 <https://CRAN.R-project.org/package=scrutiny>.  
656 19. Anaya J. The GRIMMER test: A method for testing the validity of reported measures of  
657 variability. *PeerJ Preprints.* 2016;4:e2400v1.  
658 20. Heathers JA, Anaya J, van der Zee T, Brown NJ. Recovering data from summary statistics:  
659 Sample parameter reconstruction via iterative techniques (SPRITE). *PeerJ Preprints;* 2018. Report  
660 No.: 2167-9843.  
661 21. Microsoft Corporation. Microsoft Excel. 2018.  
662 22. Guyatt GH, Oxman AD, Vist GE, Kunz R, Falck-Ytter Y, Alonso-Coello P, et al. GRADE: an  
663 emerging consensus on rating quality of evidence and strength of recommendations. *BMJ.*  
664 2008;336(7650):924-6.  
665 23. Viechtbauer W. Conducting meta-analyses in R with the metafor package. 2010.  
666 24. DerSimonian R, Laird N. Meta-analysis in clinical trials. *Control Clin Trials.* 1986;7(3):177-88.  
667 25. DerSimonian R, Laird N. Meta-analysis in clinical trials revisited. *Contemp Clin Trials.*  
668 2015;45(Pt A):139-45.  
669 26. Mheissen S, Khan H, Normando D, Vaiid N, Flores-Mir C. Do statistical heterogeneity  
670 methods impact the results of meta- analyses? A meta epidemiological study. *PLoS One.*  
671 2024;19(3):e0298526.

- 672 27. Maechler M, Rousseeuw P, Struyf A, Hubert M, Hornik K. cluster: Cluster Analysis Basics and  
673 Extensions. R package version 2.1.0. [Available from:  
674 <https://cran.r-project.org/web/packages/cluster/index.html> ]. 2019.
- 675 28. Pearson ES. The choice of statistical tests illustrated on the interpretation of data classed in a  
676 2× 2 table. *Biometrika*. 1947;34(1/2):139-67.
- 677 29. Campbell I. Chi-squared and Fisher-Irwin tests of two-by-two tables with small sample  
678 recommendations. *Stat Med*. 2007;26(19):3661-75.
- 679 30. Simonsohn U. Just post it: the lesson from two cases of fabricated data detected by statistics  
680 alone. *Psychol Sci*. 2013;24(10):1875-88.
- 681 31. Bolland MJ, Avenell A, Gamble GD, Grey A. Systematic review and statistical analysis of the  
682 integrity of 33 randomized controlled trials. *Neurology*. 2016;87(23):2391-402.
- 683 32. Hunter KE, Seidler AL, Askie LM. Prospective registration trends, reasons for retrospective  
684 registration and mechanisms to increase prospective registration compliance: descriptive analysis  
685 and survey. *BMJ Open*. 2018;8(3):e019983.
- 686 33. Harriman SL, Patel J. When are clinical trials registered? An analysis of prospective versus  
687 retrospective registration. *Trials*. 2016;17:187.
- 688 34. Azar M, Riehm KE, Saadat N, Sanchez T, Chiovitti M, Qi L, et al. Evaluation of Journal  
689 Registration Policies and Prospective Registration of Randomized Clinical Trials of Nonregulated  
690 Health Care Interventions. *JAMA Intern Med*. 2019;179(5):624-32.
- 691 35. Hamilton DG, Hong K, Fraser H, Rowhani-Farid A, Fidler F, Page MJ. Prevalence and  
692 predictors of data and code sharing in the medical and health sciences: systematic review with meta-  
693 analysis of individual participant data. *BMJ*. 2023;382:e075767.
- 694 36. Brown NJ, Heathers J. Rounded Input Variables, Exact Test Statistics (RIVETS). 2019.
- 695 37. BOX GEP. NON-NORMALITY AND TESTS ON VARIANCES. *Biometrika*. 1953;40(3-4):318-35.
- 696 38. Davey J, Turner RM, Clarke MJ, Higgins JP. Characteristics of meta-analyses and their  
697 component studies in the Cochrane Database of Systematic Reviews: a cross-sectional, descriptive  
698 analysis. *BMC Med Res Methodol*. 2011;11:160.
- 699 39. Thomas J, Flemyng E, Noel-Stoor A, Moy W, Marshall I, Hajji R, et al. Responsible AI in  
700 Evidence Synthesis (RAISE): guidance and recommendations (Draft for consultation and revision)  
701 Open Science Framework2024 [Available from: <https://osf.io/cn7x4>.

702

703

704

705

## 706 **Figure legends**

707 Figure 1: Responses to trustworthiness checks in four domains

708 S Figure 1: Study-level responses to trustworthiness checks

709 S Figure 2: Dendrogram displaying hierarchical clustering of checks using complete  
710 agglomeration based on Gower dissimilarity

711

# Inspecting the results in the paper

medRxiv preprint doi: <https://doi.org/10.1101/2024.11.25.24316905>; this version posted November 26, 2024. The copyright holder for this preprint (which was not certified by peer review) is the author/funder, who has granted medRxiv a license to display the preprint in perpetuity. It is made available under a [CC-BY 4.0 International license](https://creativecommons.org/licenses/by/4.0/).

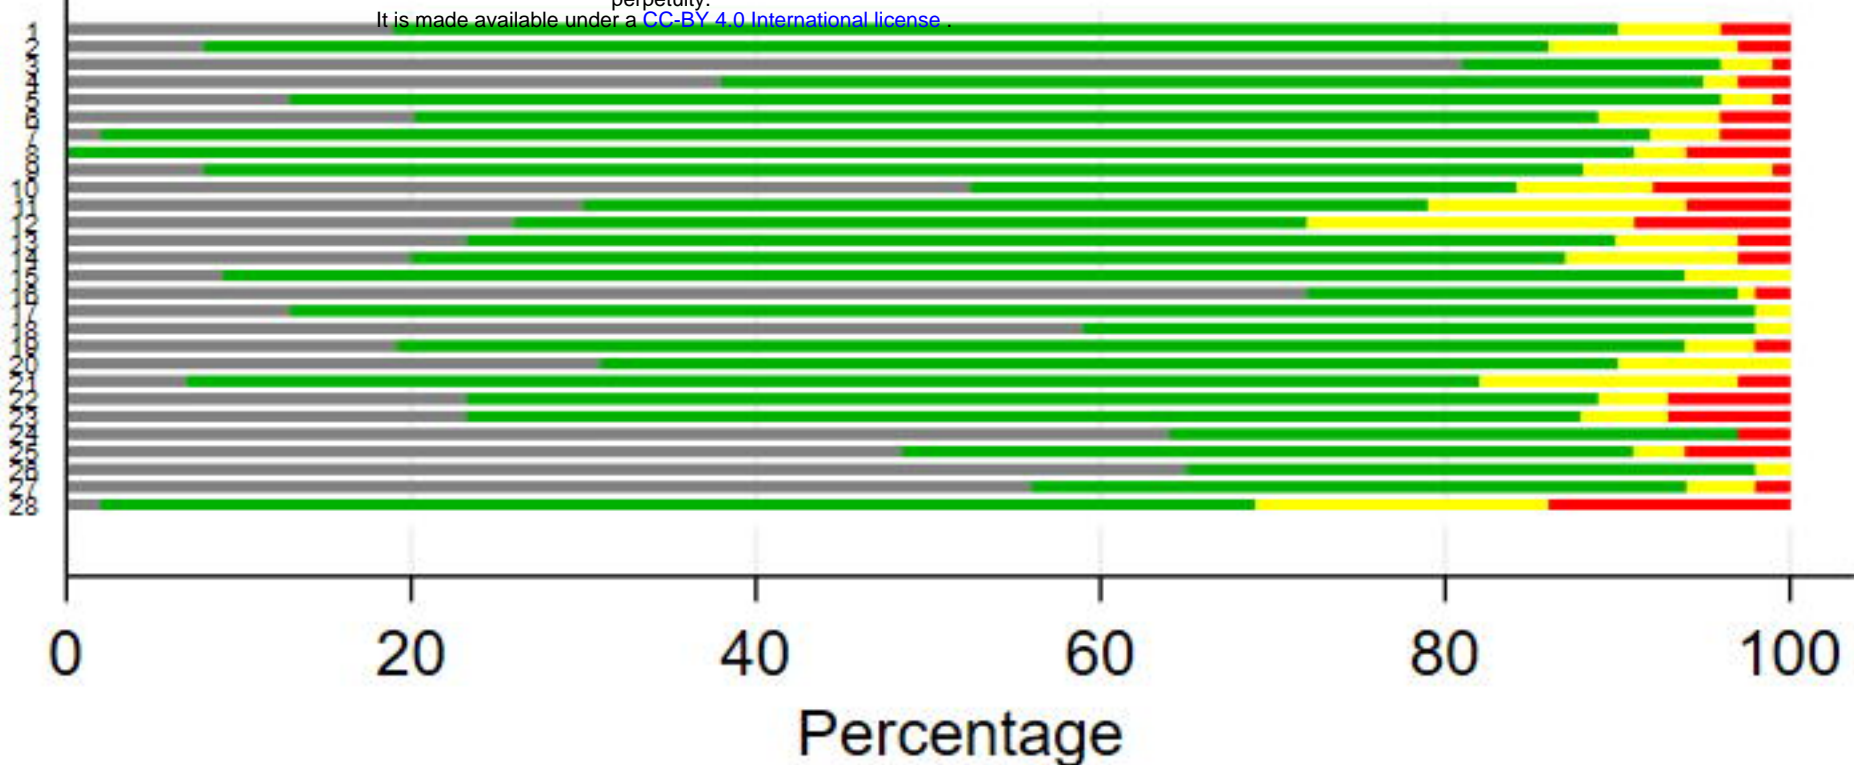

# Inspecting the research team and their work

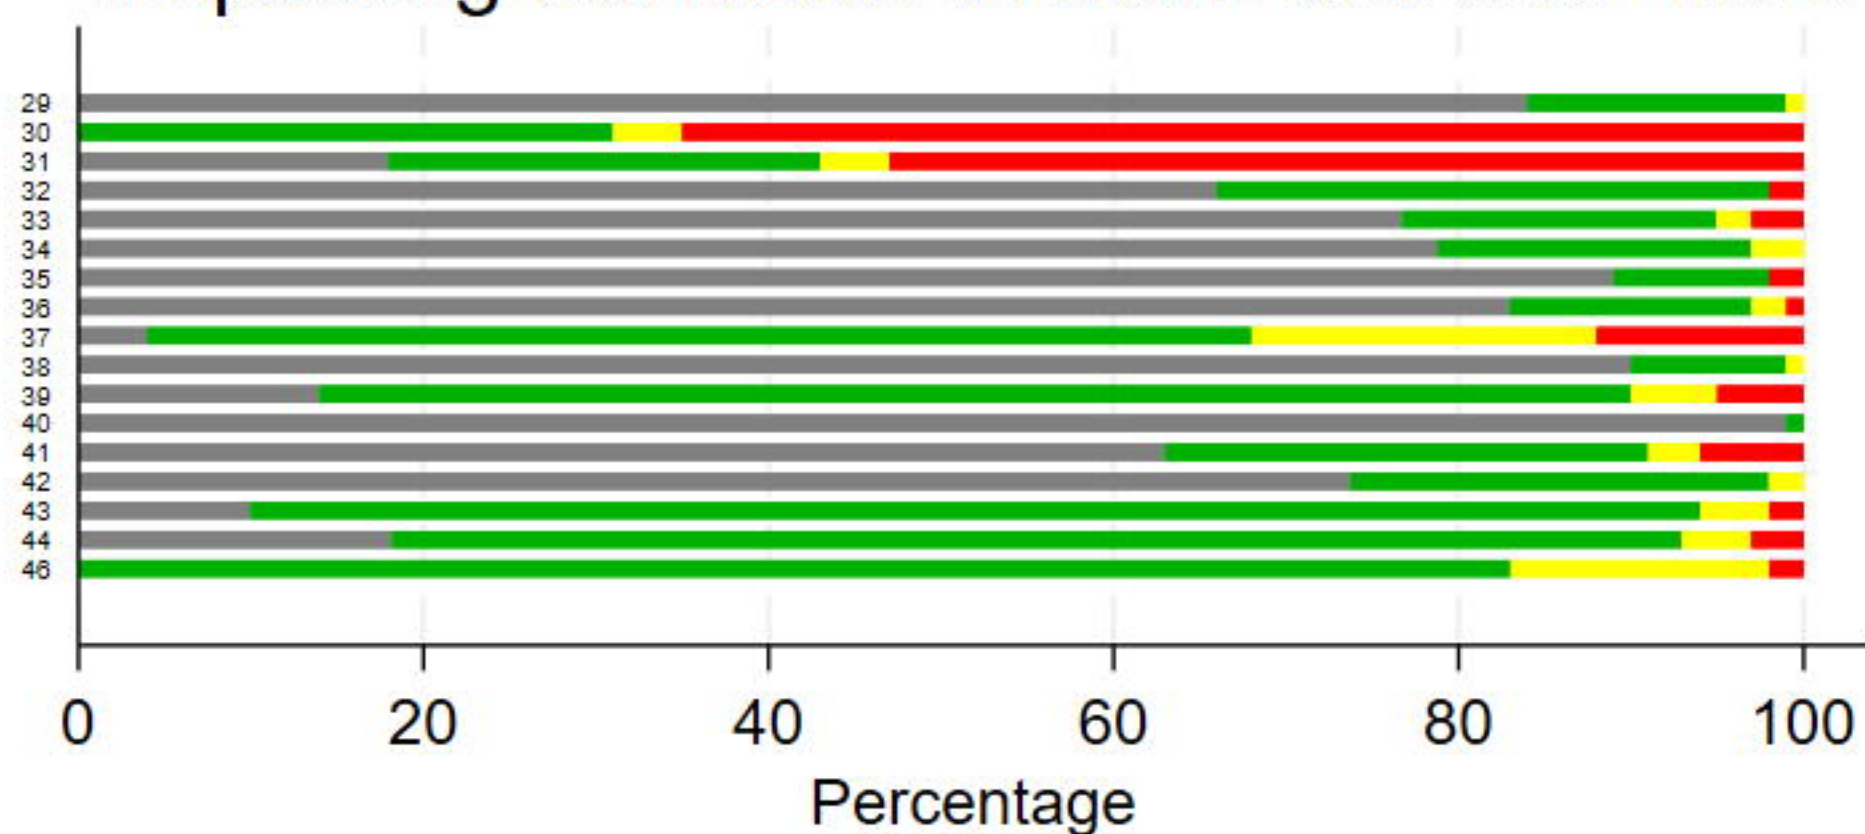

# Inspecting conduct, governance & transparency

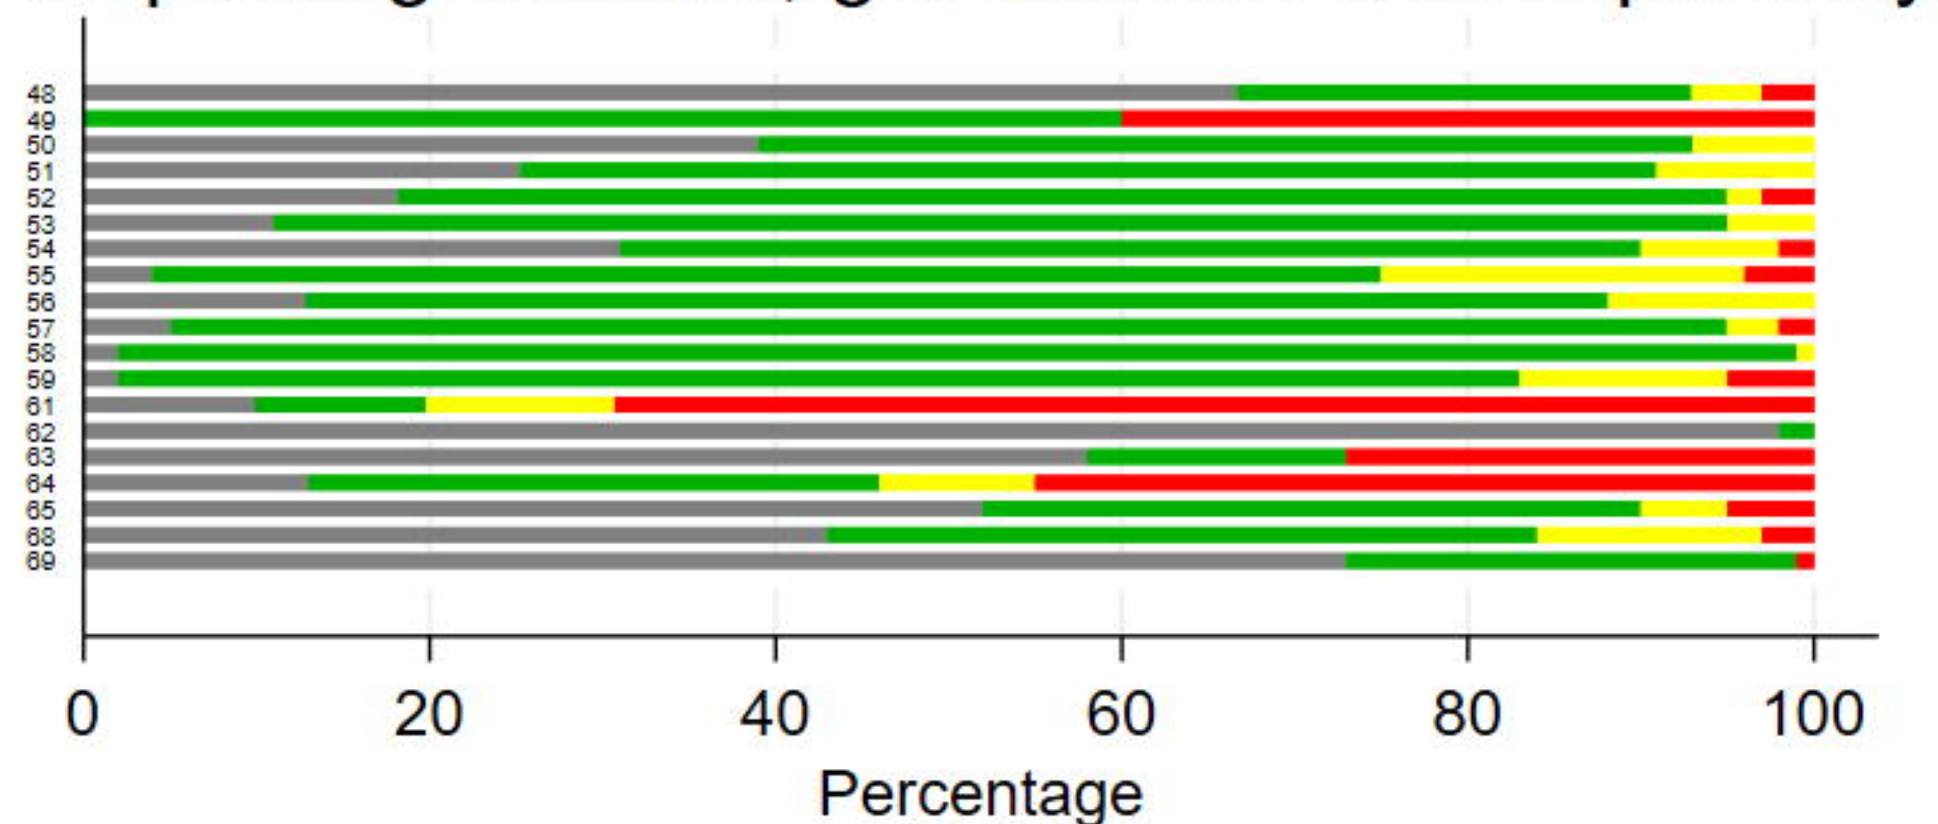

# Inspecting text and publication details

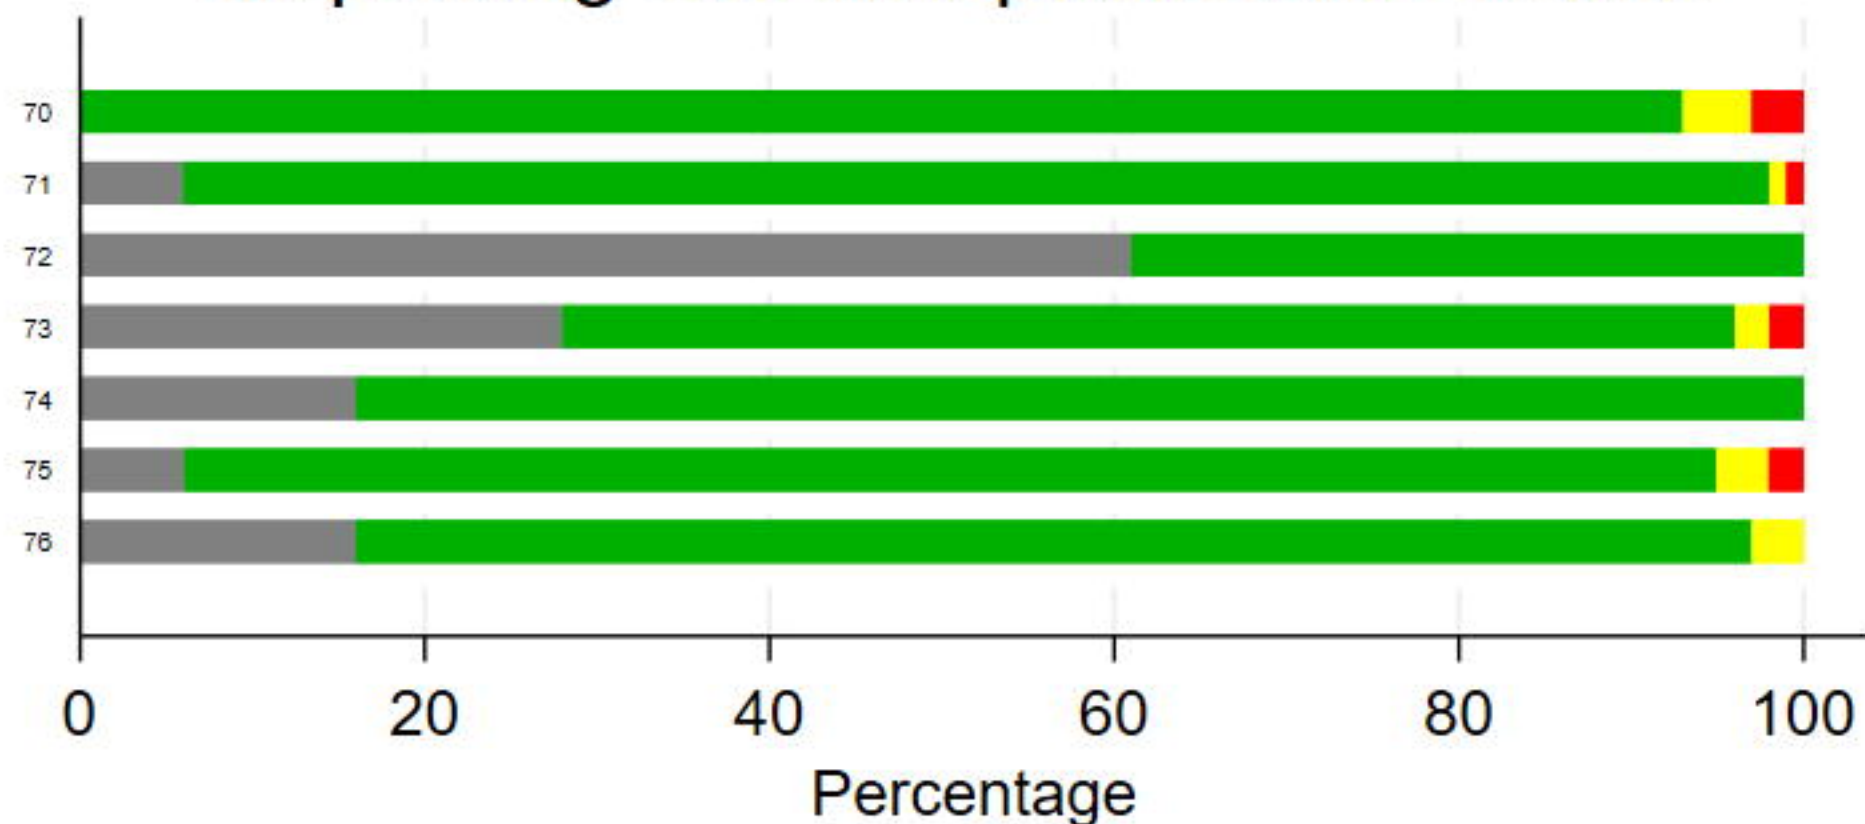

Not feasible
  Passed
  Possible fail
  Fail

medRxiv preprint doi: <https://doi.org/10.1101/2024.11.25.24316905>; this version posted November 26, 2024. The copyright holder for this preprint (which was not certified by peer review) is the author/funder, who has granted medRxiv a license to display the preprint in perpetuity. It is made available under a [CC-BY 4.0 International license](#).

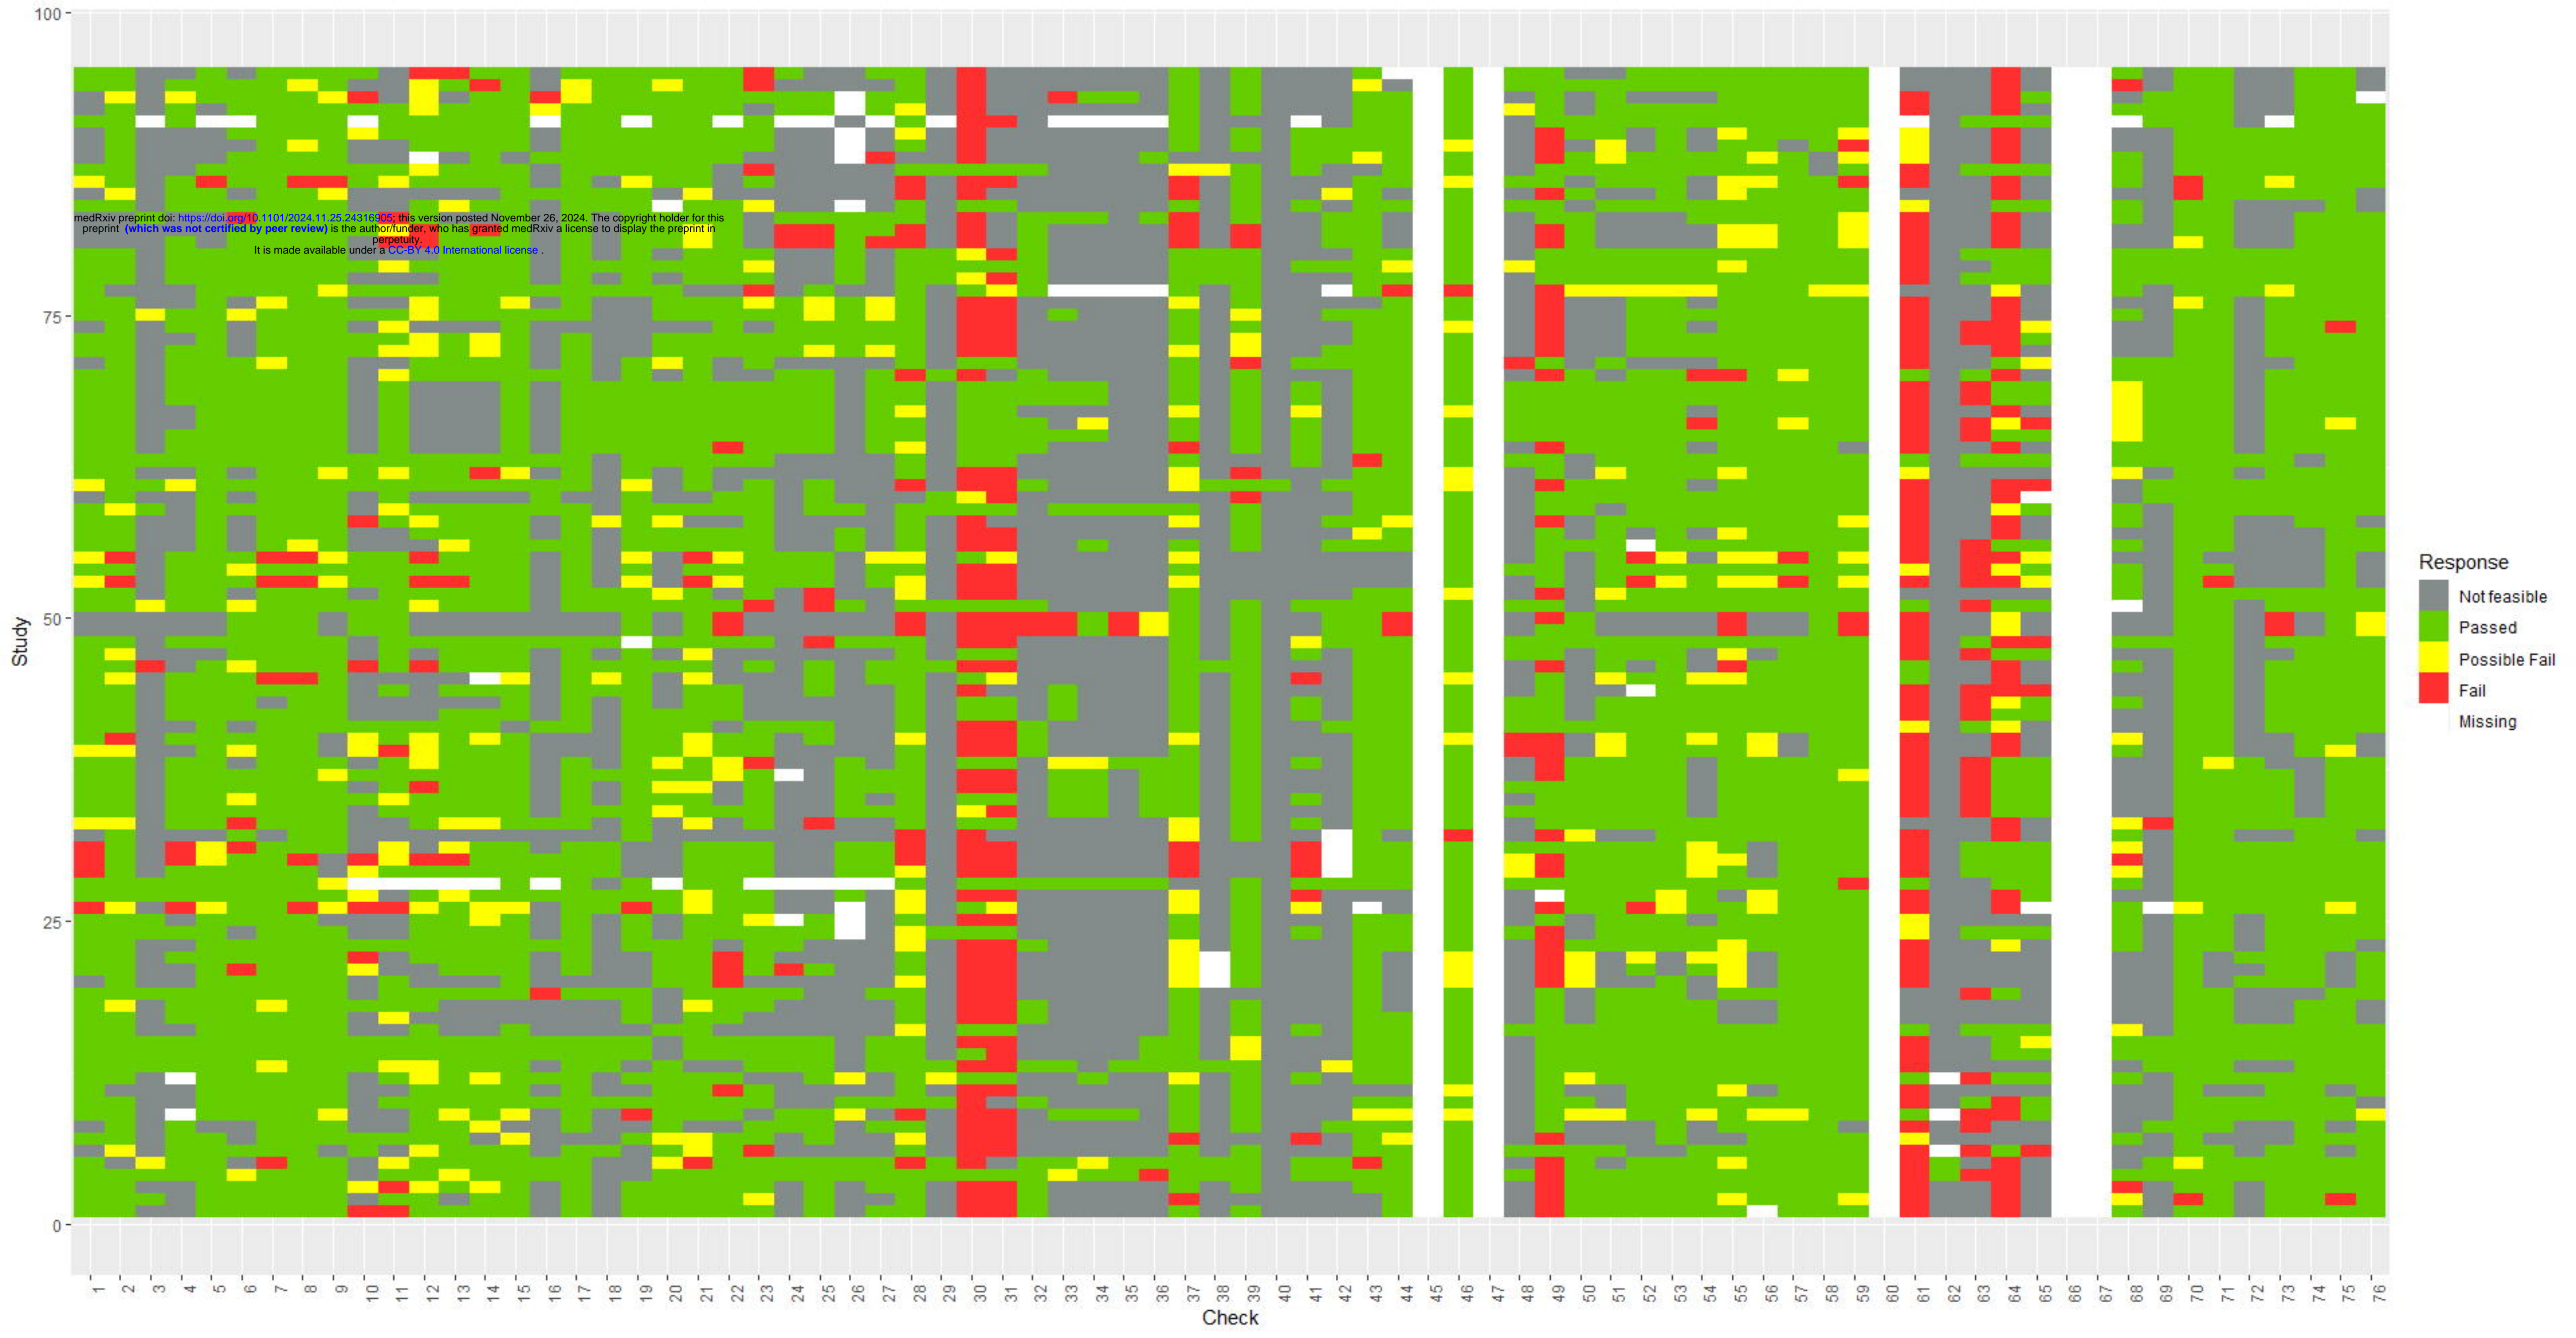

# Cluster Dendrogram

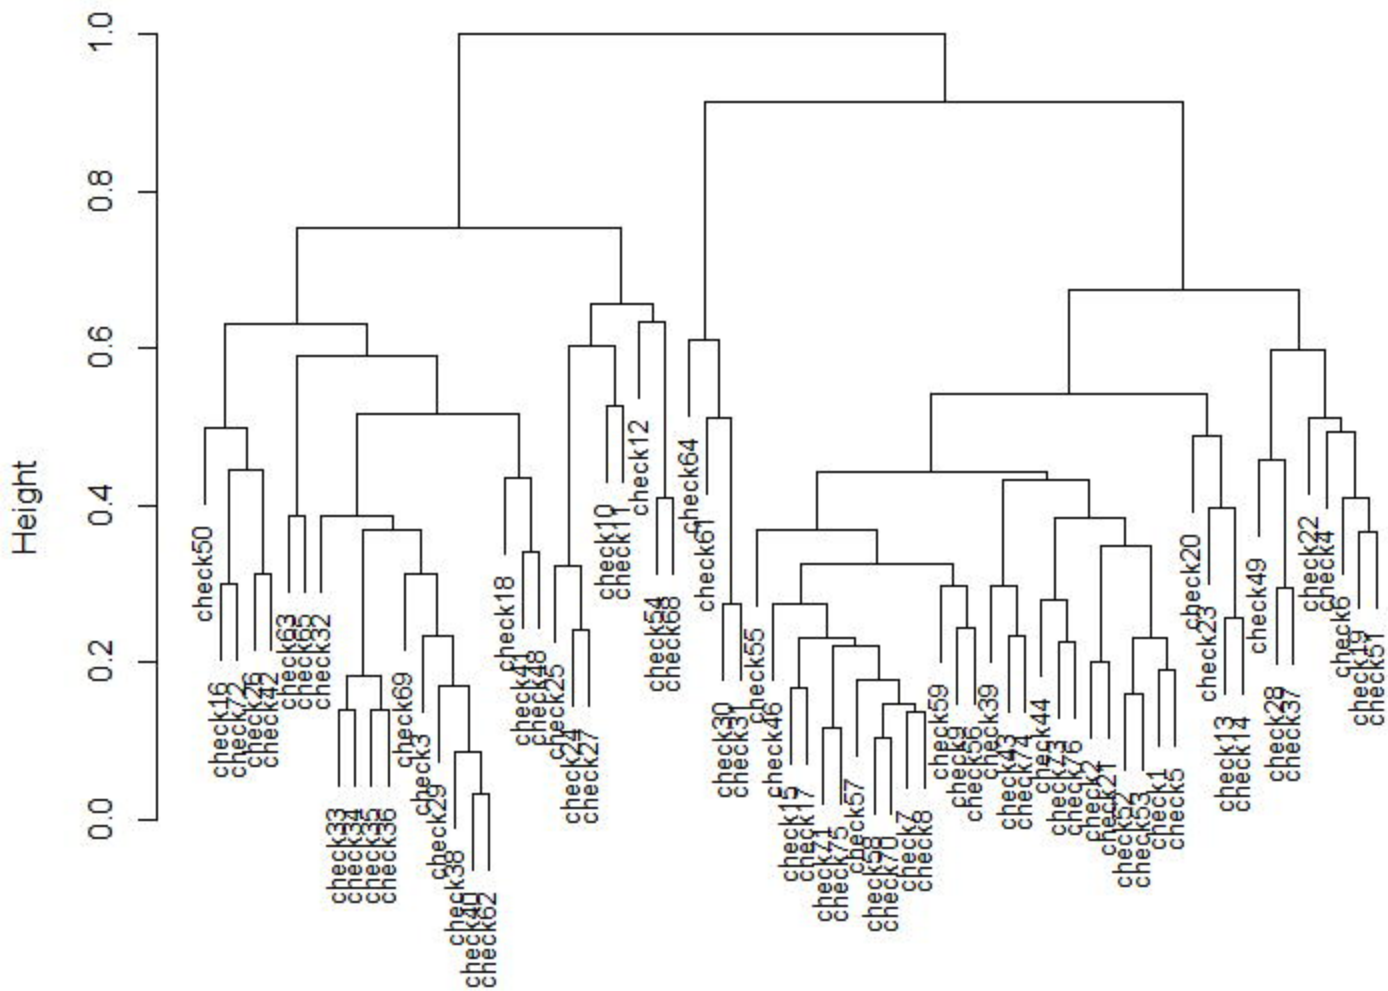

Complete linkage using Gower dissimilarity  
hclust(\*, "complete")
